# Supplementary material
Source: PubMed Central journal article supplement (PMC3372726)
Supplement: bph0165-1413-SD1.pdf [file bph0165-1413-SD1.pdf]

## Supplementary Information

Suen et al

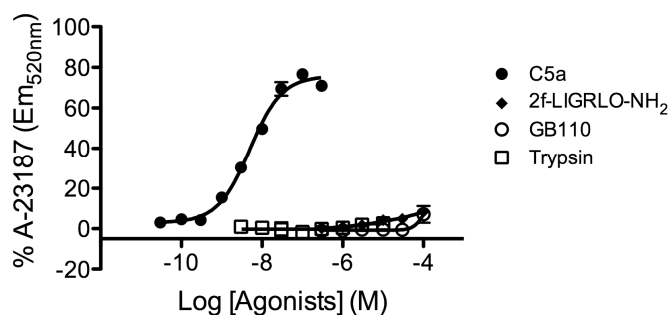

**Figure S1.** PAR2 agonists do not induce intracellular  $\text{Ca}^{2+}$  release in U937 cells.

Human U937 cells were treated with C5a (●), 2f-LIGRLO-NH<sub>2</sub> (◆), GB110 (○) and trypsin (□) in the fluorescence intracellular calcium assay. Up to 100 μM of 2f-LIGRLO-NH<sub>2</sub> or GB110 and up to 10 μM trypsin caused no significant  $\text{iCa}^{2+}$  release, whereas the hormone C5a did induce  $\text{iCa}^{2+}$  release at nM concentrations. Error bars represented  $\pm$  S.E.M. with  $n \geq 3$ .

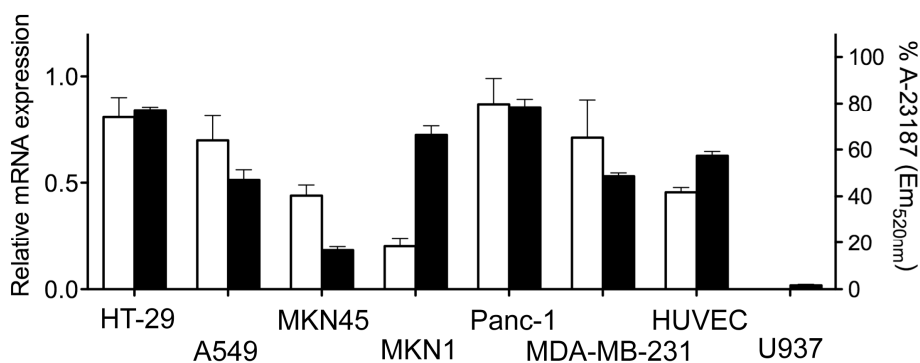

**Figure S2.** PAR<sub>2</sub> mRNA expression correlates with PAR<sub>2</sub> surface activity on multiple human cell lines. Quantitative RT-PCR examination of PAR<sub>2</sub> mRNA expression in 8 human cell lines is shown in comparison to human housekeeping gene hypoxanthine guanine phosphoribosyl transferase (HPRT). PAR<sub>2</sub> mRNA expression (clear) on each cell line is compared with maximum PAR<sub>2</sub>-induced intracellular calcium release (filled). Calcium release is expressed as a percentage of that induced by calcimycin (A-23187) and is used as an indicator of PAR<sub>2</sub> activity on cell surfaces. PAR<sub>2</sub> mRNA levels and its activities were comparable in the cell lines tested. Error bars represented  $\pm$  S.E.M. with  $n \geq 3$ .

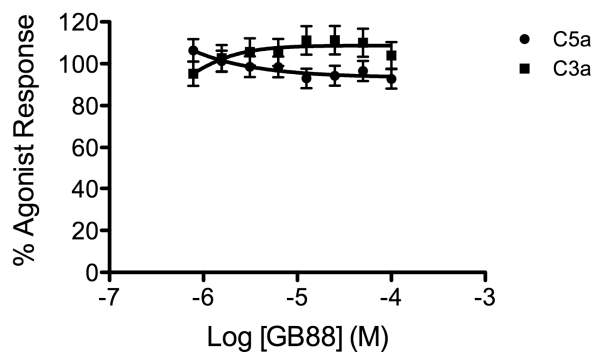

**Figure S3.** GB88 does not antagonize two other GPCRs. Human U937 cells were treated with either 30nM C5a (●) or 300nM C3a (■) in an intracellular calcium assay. Up to 100 $\mu$ M GB88 showed no significant reduction in  $i\text{Ca}^{2+}$  release in these cells. Error bars represent  $\pm$  S.E.M. with  $n \geq 3$ .

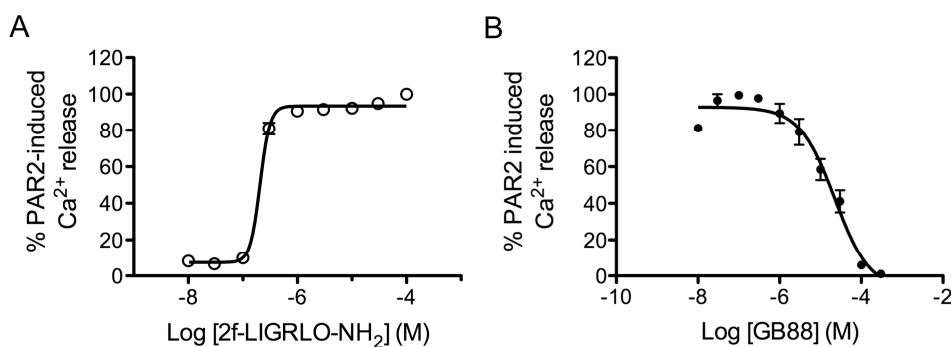

**Figure S4.** Profile of PAR<sub>2</sub> agonist (2f-LIGRLO-NH<sub>2</sub>) and antagonist (GB88) on rat NRK-52e cells. A, concentration-dependent curve for iCa<sup>2+</sup> mobilization by 2f-LIGRLO-NH<sub>2</sub>. EC<sub>50</sub> 210 nM (pEC<sub>50</sub> 6.7 ± 0.07). B, PAR<sub>2</sub> antagonist GB88 inhibits iCa<sup>2+</sup> release induced in NRK-52e by 1 µM 2f-LIGRLO-NH<sub>2</sub>. IC<sub>50</sub> 20 µM (pIC<sub>50</sub> 4.7 ± 0.2). Data points = means of 3 experiments in triplicate, bars = S.E.

**Method:** Quantitative RT-PCR

Cells were plated at  $2 \times 10^6$  cells/well in a 6-well plate for overnight, after which total RNA was isolated using GenElute Mammalian Total RNA Miniprep Kit (Sigma Aldrich) according to manufacturer's instructions. RNA was reverse-transcribed using Superscript III (Invitrogen) and an oligo-dT primer. Relative gene expression was quantitated by real-time PCR using SYBR Green PCR master mix (Applied Biosystems, Foster City, CA, USA) on an Applied Biosystems Prism 7000 sequence detector. Amplification cycle proceeded as followed: 50°C for 2 min and 95°C for 10 min, followed by 40 cycles of 95°C for 15 s and 50°C for 1 min. cDNA levels at the linear phase of amplification were compared to hypoxanthine guanine phosphofibosyl transferase (HPRT) levels, and expressed as a relative expression of HPRT. Primer sequences used for HPRT are F- 5' TCAGGCAGTATAATCCAAAGATGGT 3'; R - 5' AGTCTGGCTTATACTCAACACTTCG 3' and for PAR2, F - 5' GGGTTTGCCAAGTAACGGC 3'; R - 5' GGGAACCAGATGACAGAGAGG 3'.
